# Supplementary material for: New Cytotoxic Azaphilones from Monascus purpureus-Fermented Rice (Red Yeast Rice)
Source: MDPI journal article supplement (doi:10.3390/molecules15031958), 2010-03-18

Compound 1 <sup>1</sup>H-NMR IN CD<sub>3</sub>Cl<sub>3</sub>

INOVA-501 1H-NMR hq-16 IN CDCL3 07.04.24

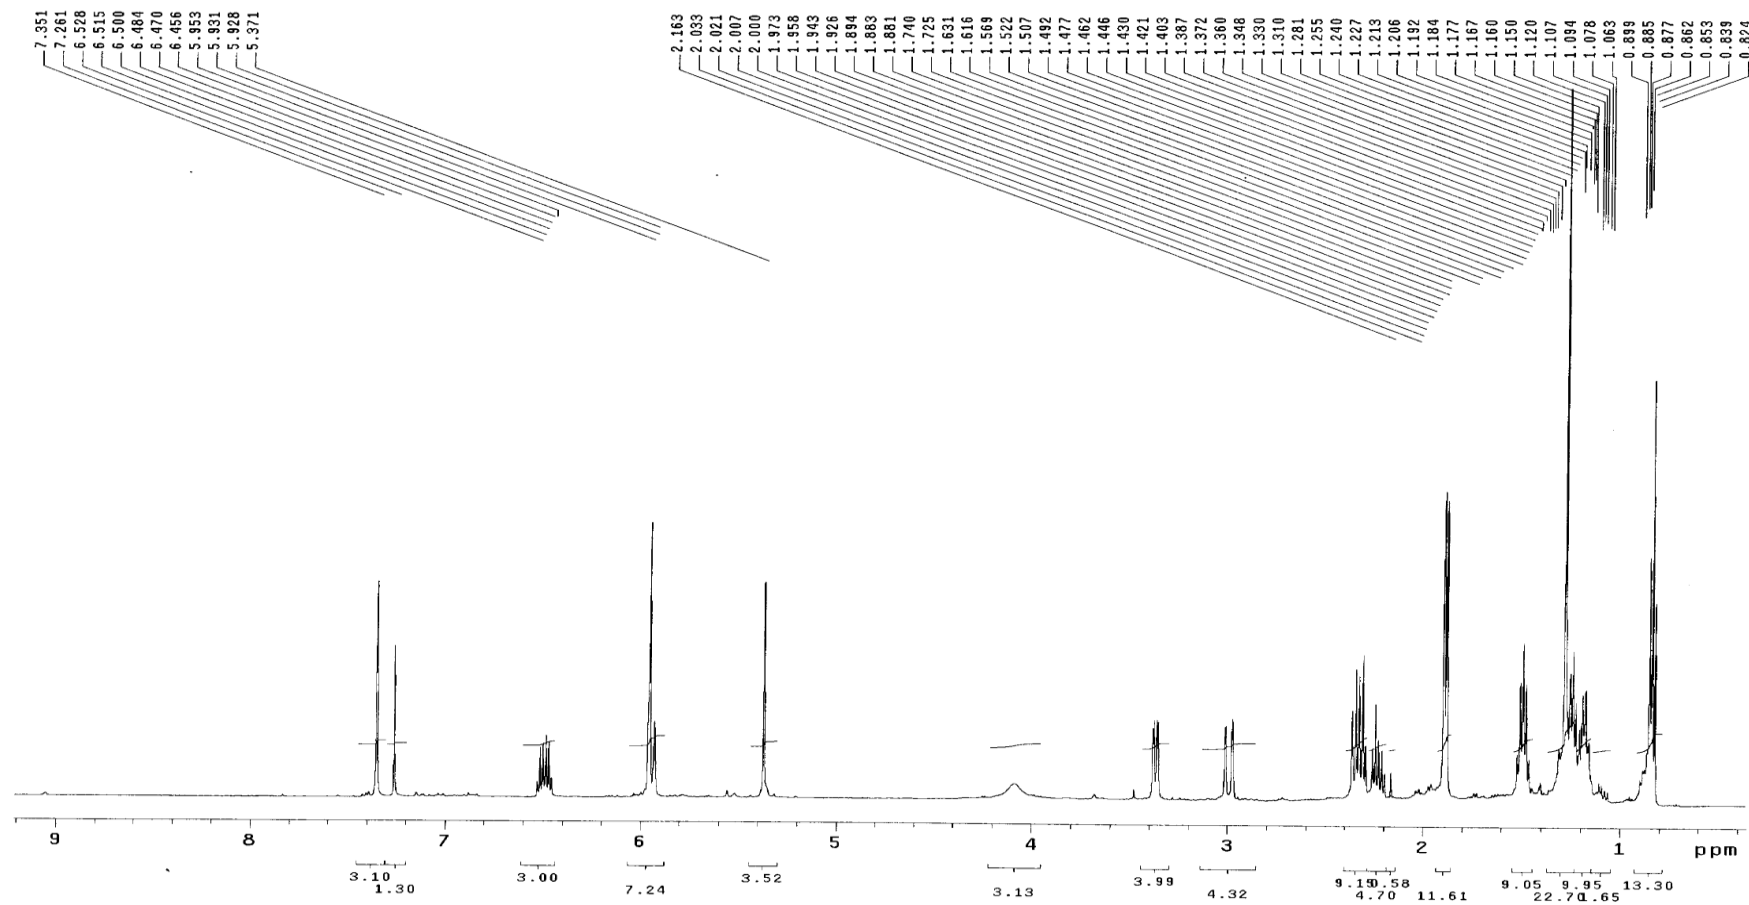

**Compound 1**  $^1\text{H-NMR}$  IN  $\text{CD}_3\text{COCD}_3$

VNS-600 1H-NMR hq-16 IN CD3COCD3 08.12.24

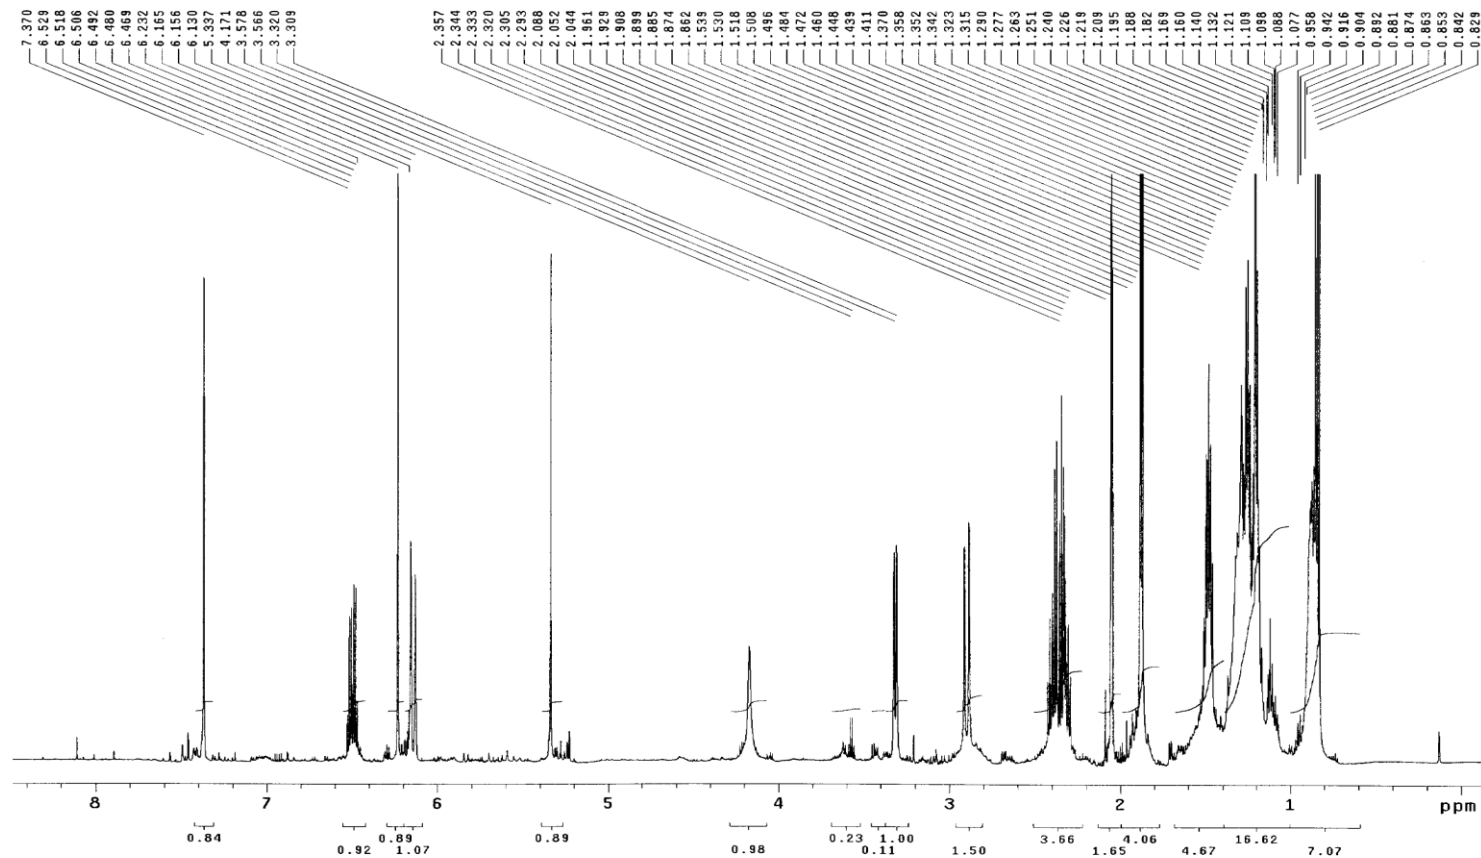

# Compound 1 C-NMR IN CD<sub>3</sub>Cl<sub>3</sub>

INOVA-500 13C-NMR HQ-16 IN CDCL<sub>3</sub> 2007.04.26

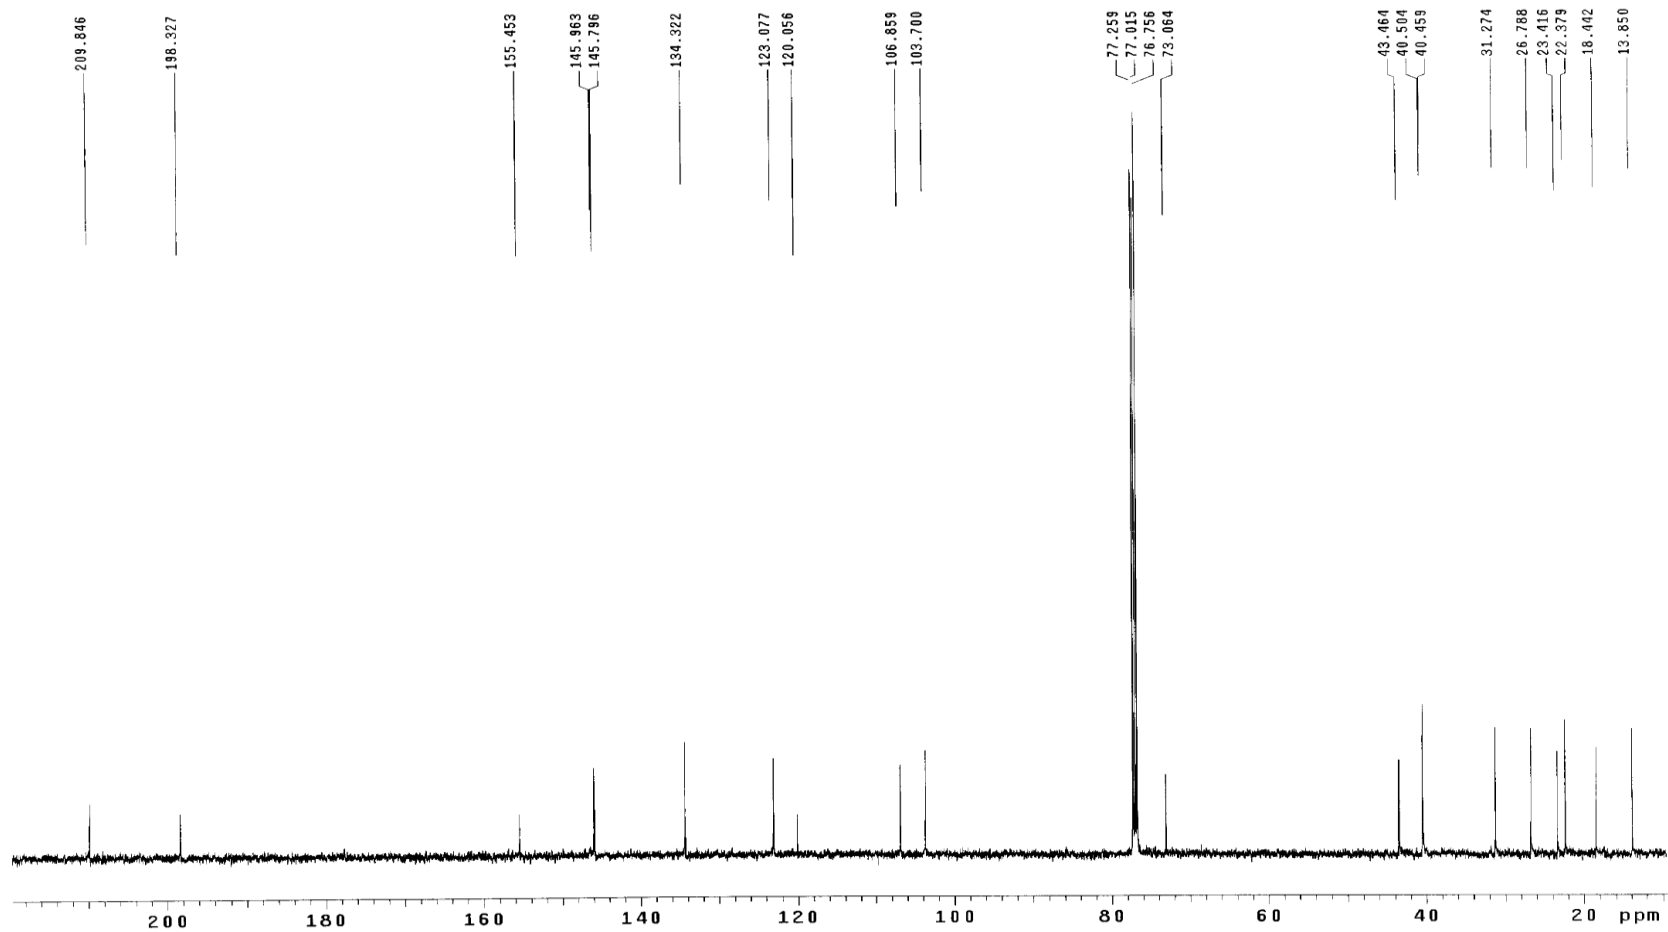

**Compound 1 DEPT-NMR IN CD<sub>3</sub>Cl<sub>3</sub>**

INOVA-500 DEPT-NMR HQ-16 IN CDCL3 2007.06.27

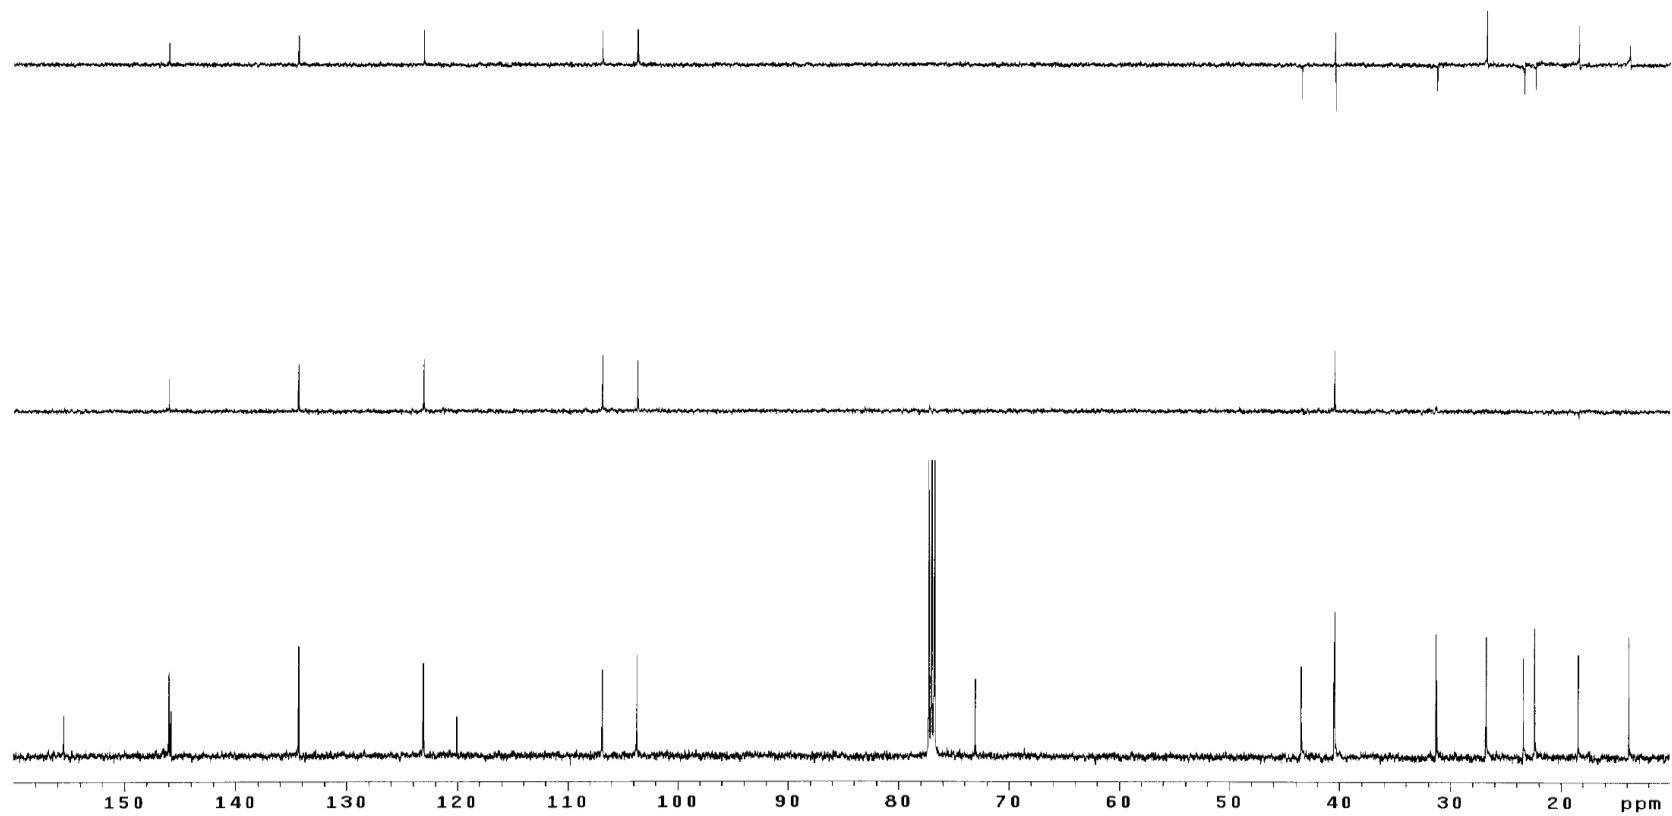

Compound 1 gCOSY IN CD<sub>3</sub>Cl<sub>3</sub>

INOVA-501 gCOSY HQ-16 IN CDCL<sub>3</sub> 07.05.21

Solvent: CDCl<sub>3</sub>  
Temp. 25.0 C / 298.1 K  
INOVA-500 "IMM-501"  
  
Relax. delay 1.000 sec  
Acq. time 0.126 sec  
Width 4070.6 Hz  
2D Width 4070.6 Hz  
2 repetitions  
256 increments  
OBSERVE H1, 499.7702080 MHz  
DATA PROCESSING  
Sine bell 0.063 sec  
F1 DATA PROCESSING  
Sine bell 0.031 sec  
FT size 1024 x 1024  
Total time 10 min, 17 sec

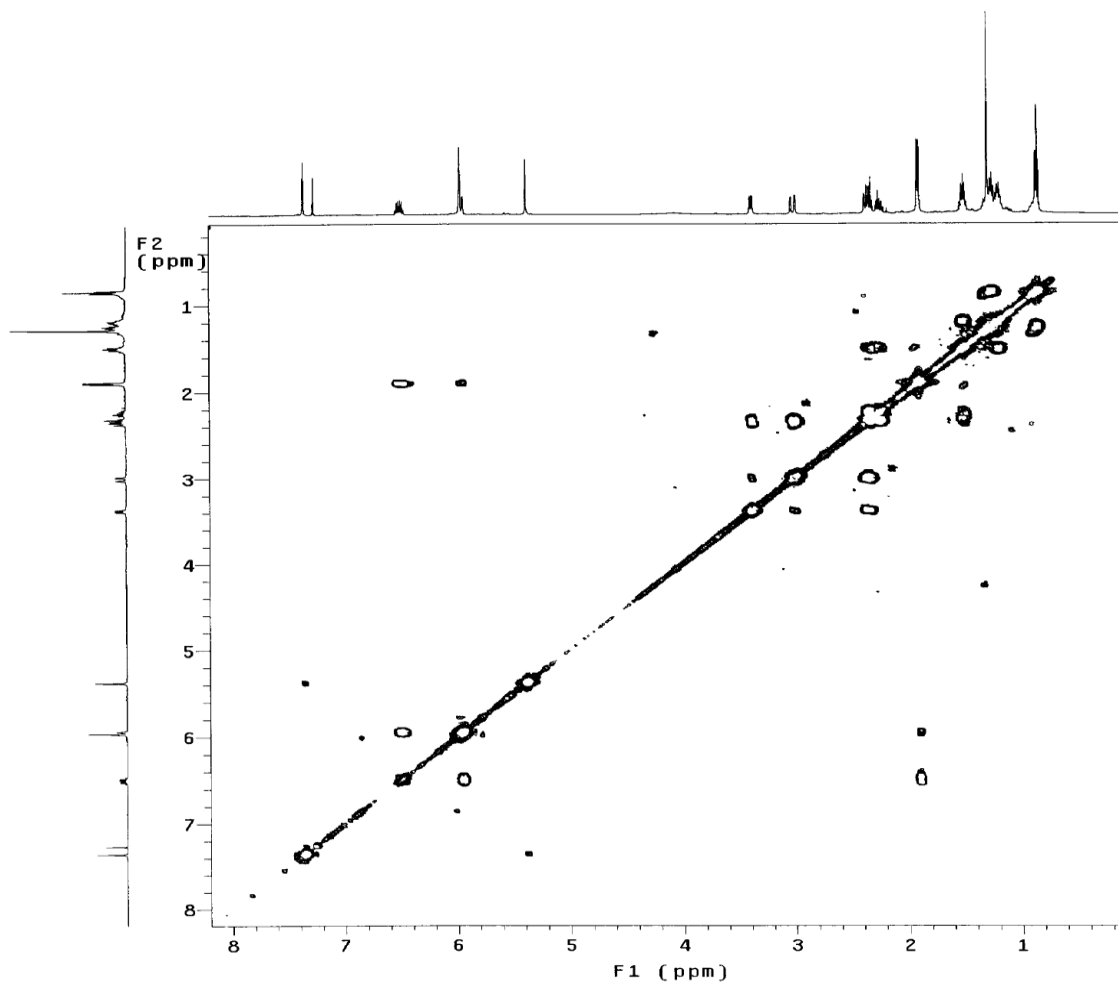

Compound 1 gCOSY IN CD<sub>3</sub>COCD

VNS-600 gCOSY hq-16 IN CD<sub>3</sub>COCD<sub>3</sub> 08.12.24

Solvent: acetone  
Ambient temperature  
Operator: vnmr2  
VNMR-600 "wormhole"

Relax. delay 1.301 sec  
Acq. time 0.205 sec  
Width 10000.0 Hz  
2D Width 10000.0 Hz  
2 repetitions  
256 increments  
OBSERVE H1, 599.6981281 MHz  
DATA PROCESSING  
Sine bell 0.099 sec  
F1 DATA PROCESSING  
Sine bell 0.009 sec  
F1 size 4096 x 4096  
Total time 13 min, 28 sec

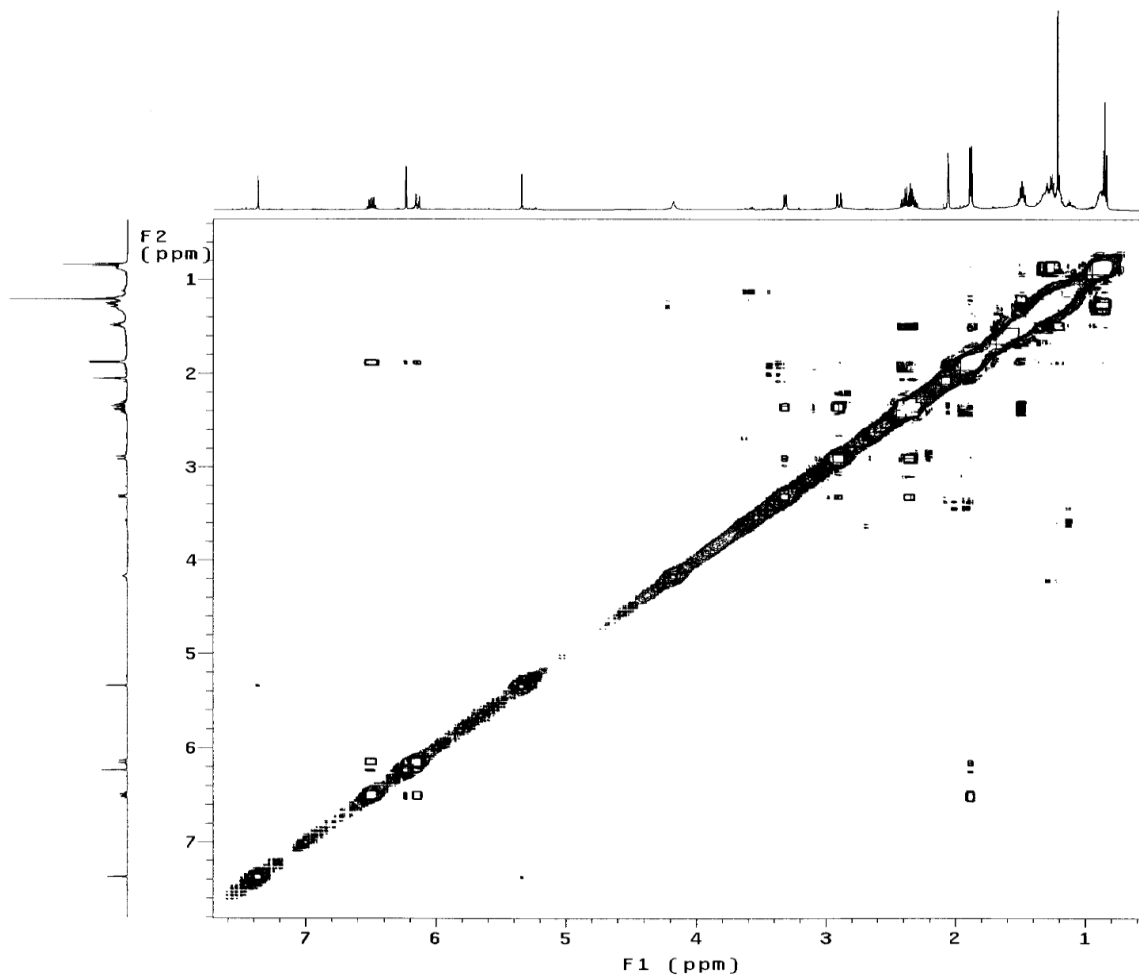

# Compound 1 gHMQC IN CD<sub>3</sub>Cl<sub>3</sub>

INOVA-501 1H-NMR HQ-16 IN CDCL3 07.05.21

Solvent: CDC13  
Temp. 25.0 C / 298.1 K  
User: 1-14-87  
INOVA-500 "IMM-501"

Relax. delay 1.000 sec  
Acq. time 0.213 sec  
Width 4797.6 Hz  
2D Width 21175.2 Hz  
16 repetitions  
160 increments  
OBSERVE H1, 499.7702080 MHz  
DECOUPLE C13, 125.6780857 MHz  
Power 48 dB  
on during acquisition  
off during delay  
GARP-1 modulated  
DATA PROCESSING  
Sine bell 0.042 sec  
F1 DATA PROCESSING  
Sine bell 0.004 sec  
FT size 2048 x 4096  
Total time 55 min, 32 sec

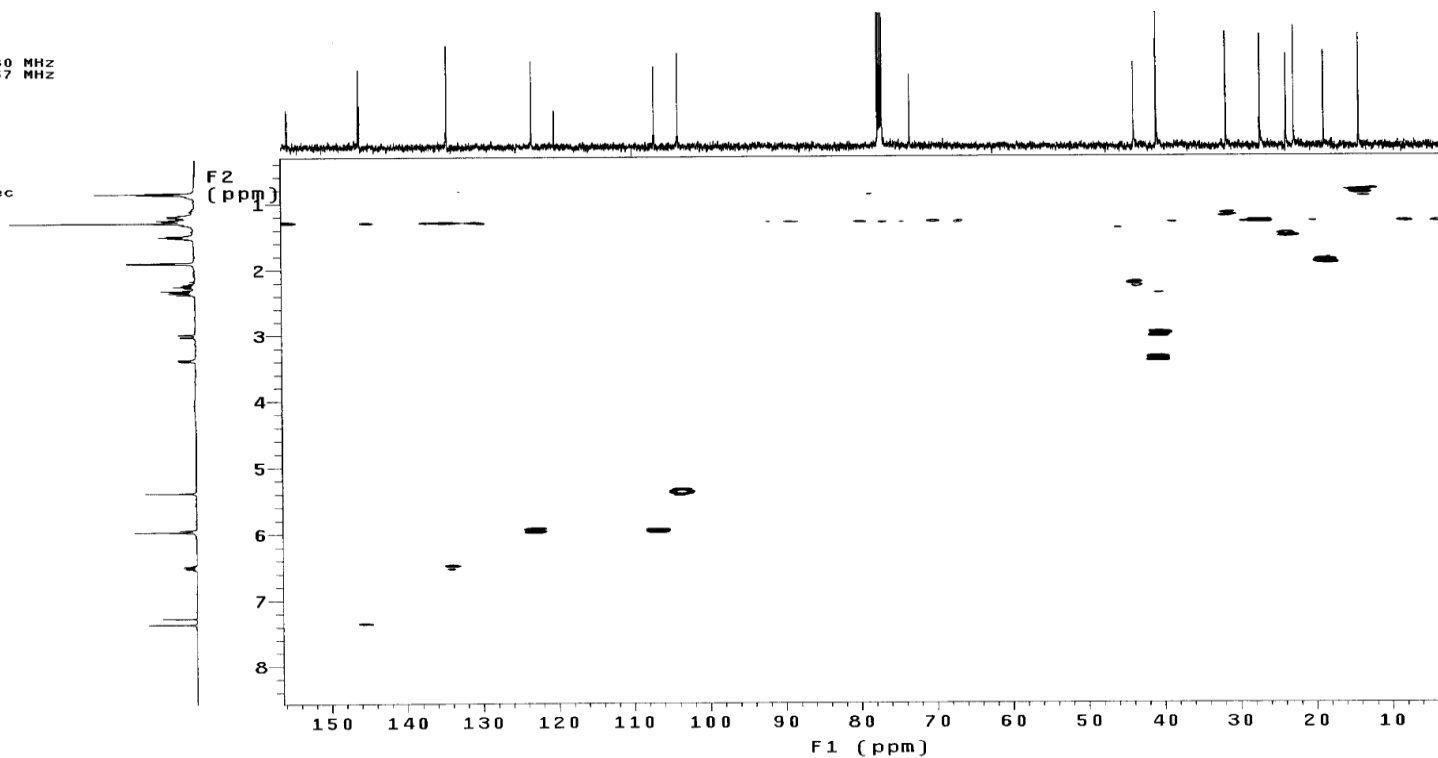

# Compound 1 gHMBC IN CD<sub>3</sub>Cl<sub>3</sub>

INOVA-501 gHMBC HQ-16 IN CDCL3 07.05.21

Solvent: CDCl<sub>3</sub>  
Temp. 25.0 C / 298.1 K  
User: 1-14-87  
INOVA-500 "IMM-501"  
  
Relax. delay 1.000 sec  
Acq. time 0.219 sec  
Width 4668.8 Hz  
2D Width 26411.4 Hz  
24 repetitions  
256 increments  
OBSERVE H1, 499.7702080 MHz  
DATA PROCESSING  
Sine bell 0.049 sec  
F1 DATA PROCESSING  
Sine bell 0.004 sec  
FT size 2048 x 4096  
Total time 2 hr, 14 min, 25 sec

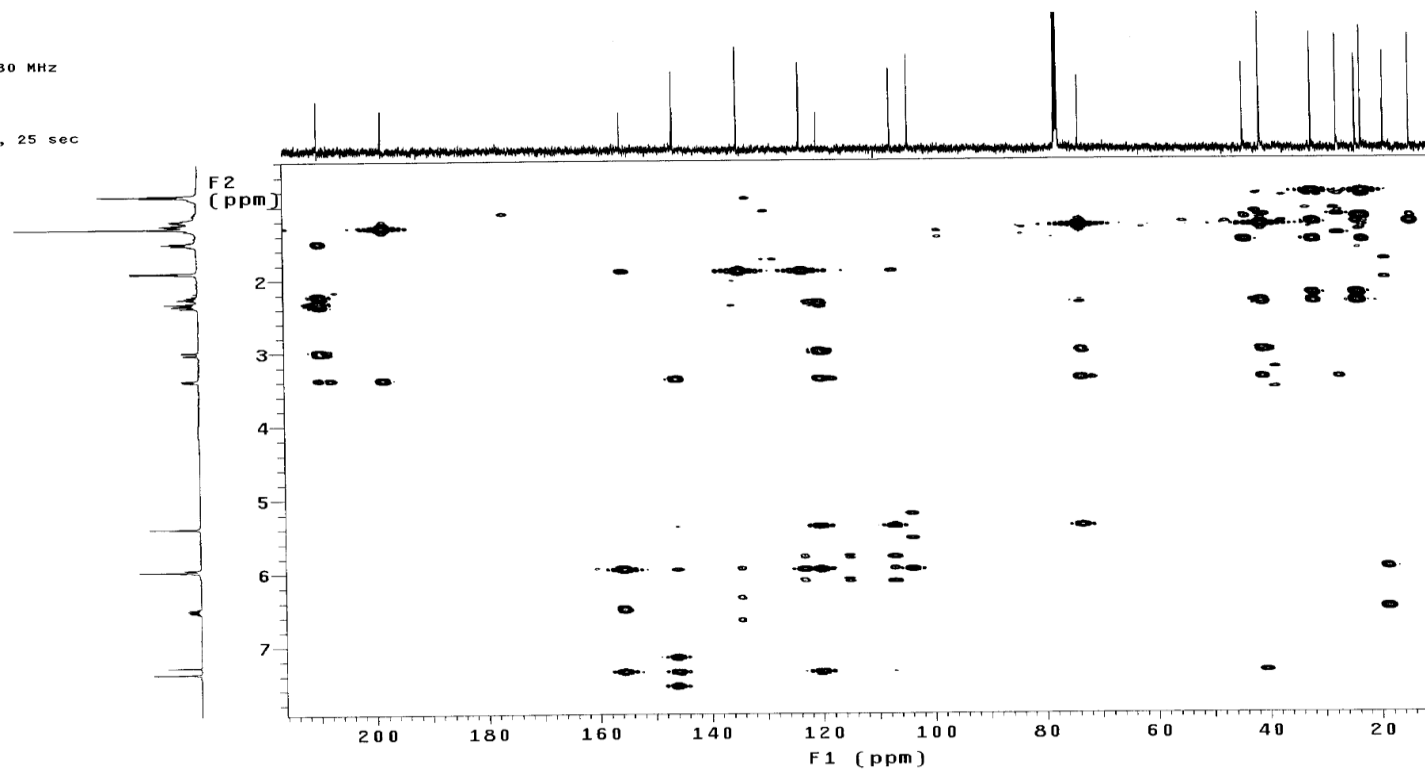



# Compound 1 NOESY IN CD<sub>3</sub>Cl<sub>3</sub>

INOVA-501 NOESY HQ-16 IN CDCL3 07.07.04

Solvent: CDC13  
Temp. 25.0 C / 298.1 K  
INOVA-500 "IMM-501"  
  
Relax. delay 1.600 sec  
Mixing 0.800 sec  
Acq. time 0.132 sec  
Width 3887.5 Hz  
2D Width 3887.5 Hz  
8 repetitions  
2 x 200 increments  
OBSERVE H1, 499.7702083 MHz  
DATA PROCESSING  
Gauss apodization 0.031 sec  
F1 DATA PROCESSING  
Gauss apodization 0.008 sec  
FT size 2048 x 2048  
Total time 2 hr, 18 min, 28 sec

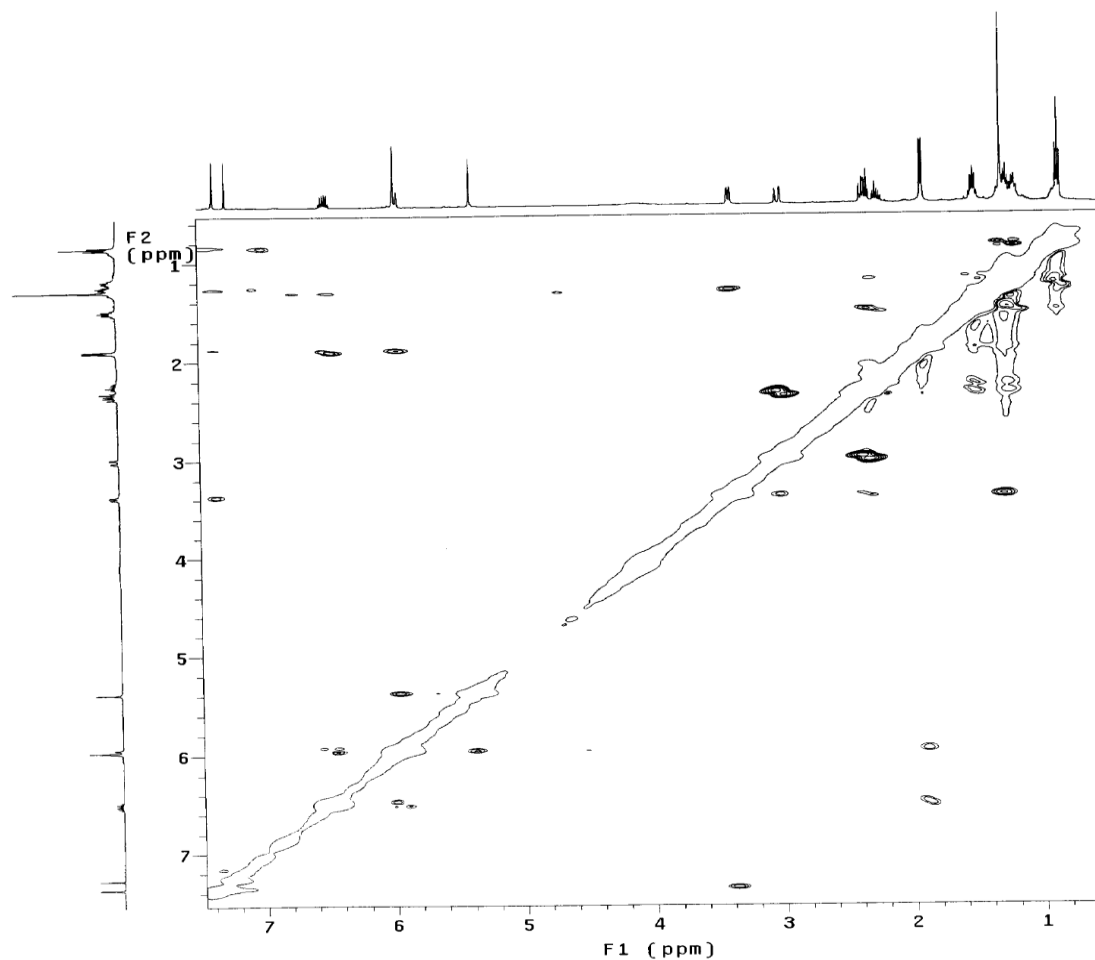

# Compound 1 NOESY IN CD<sub>3</sub>COCD<sub>3</sub>

VNS-600 NOESY hq-16 IN CD3C0CD3 08.12.24

Solvent: acetone  
Ambient temperature  
Operator: vnmr2  
VNMRS-600 "wormhole"

Relax. delay 1.200 sec  
Mixing 0.600 sec  
Acq. time 0.197 sec  
Width 5186.7 Hz  
2D Width 5186.7 Hz  
16 repetitions  
2 x 200 increments  
OBSERVE H1, 599.6981281 MHz  
DATA PROCESSING  
Gauss apodization 0.034 sec  
F1 DATA PROCESSING  
Gauss apodization 0.010 sec  
FT size 4096 x 4096  
Total time 3 hr, 38 min, 3 sec

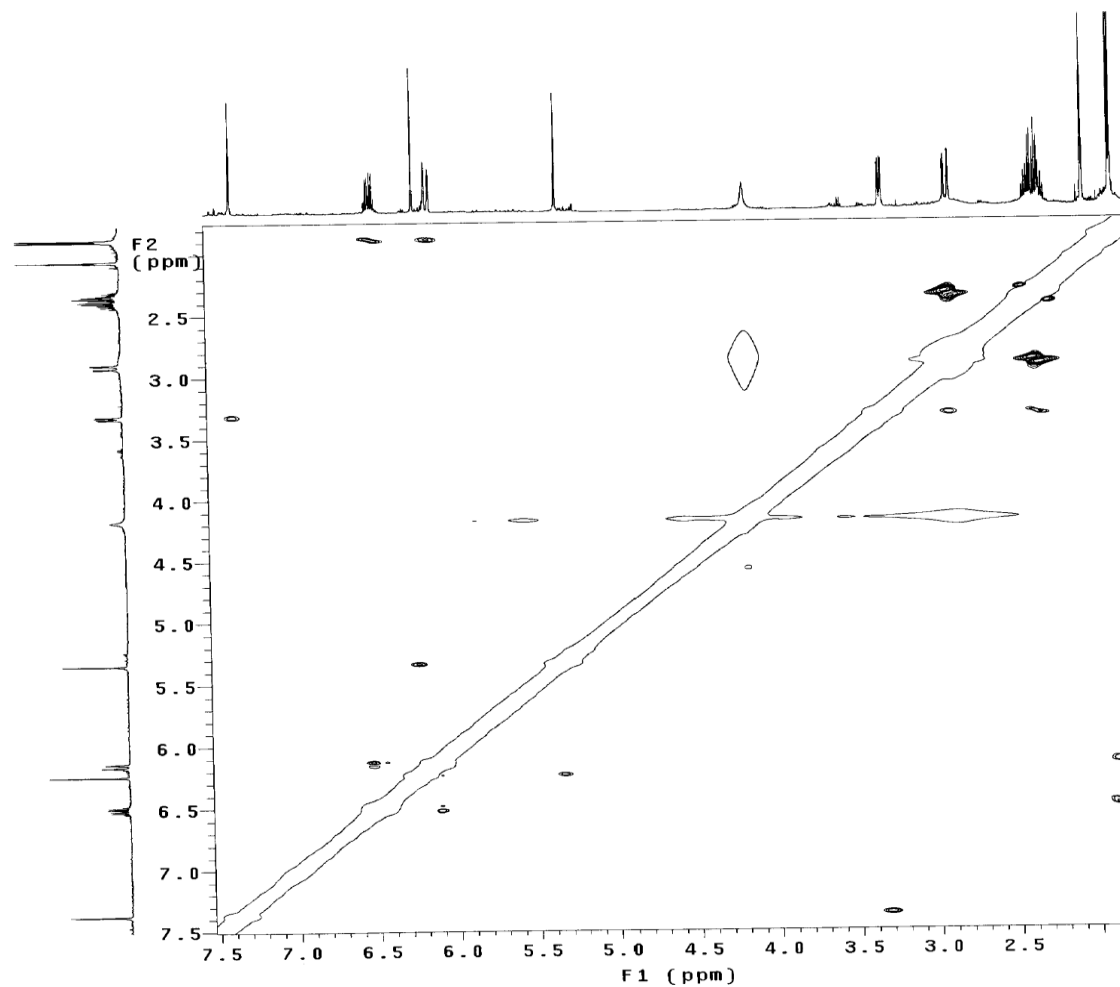

**Compound 1 CD**

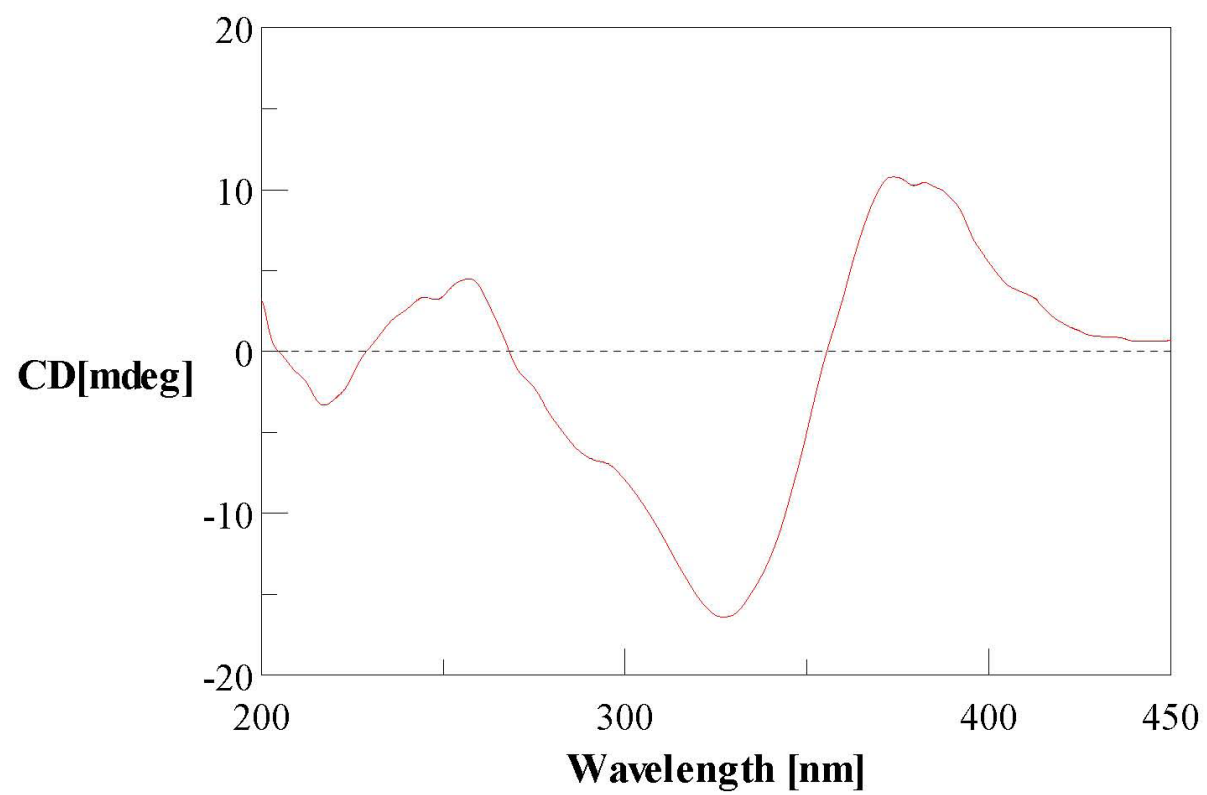

# Compound 2 <sup>1</sup>H-NMR IN CD<sub>3</sub>Cl<sub>3</sub>

INOVA-501 1H-NMR hq-13 IN CDCL3 07.04.24

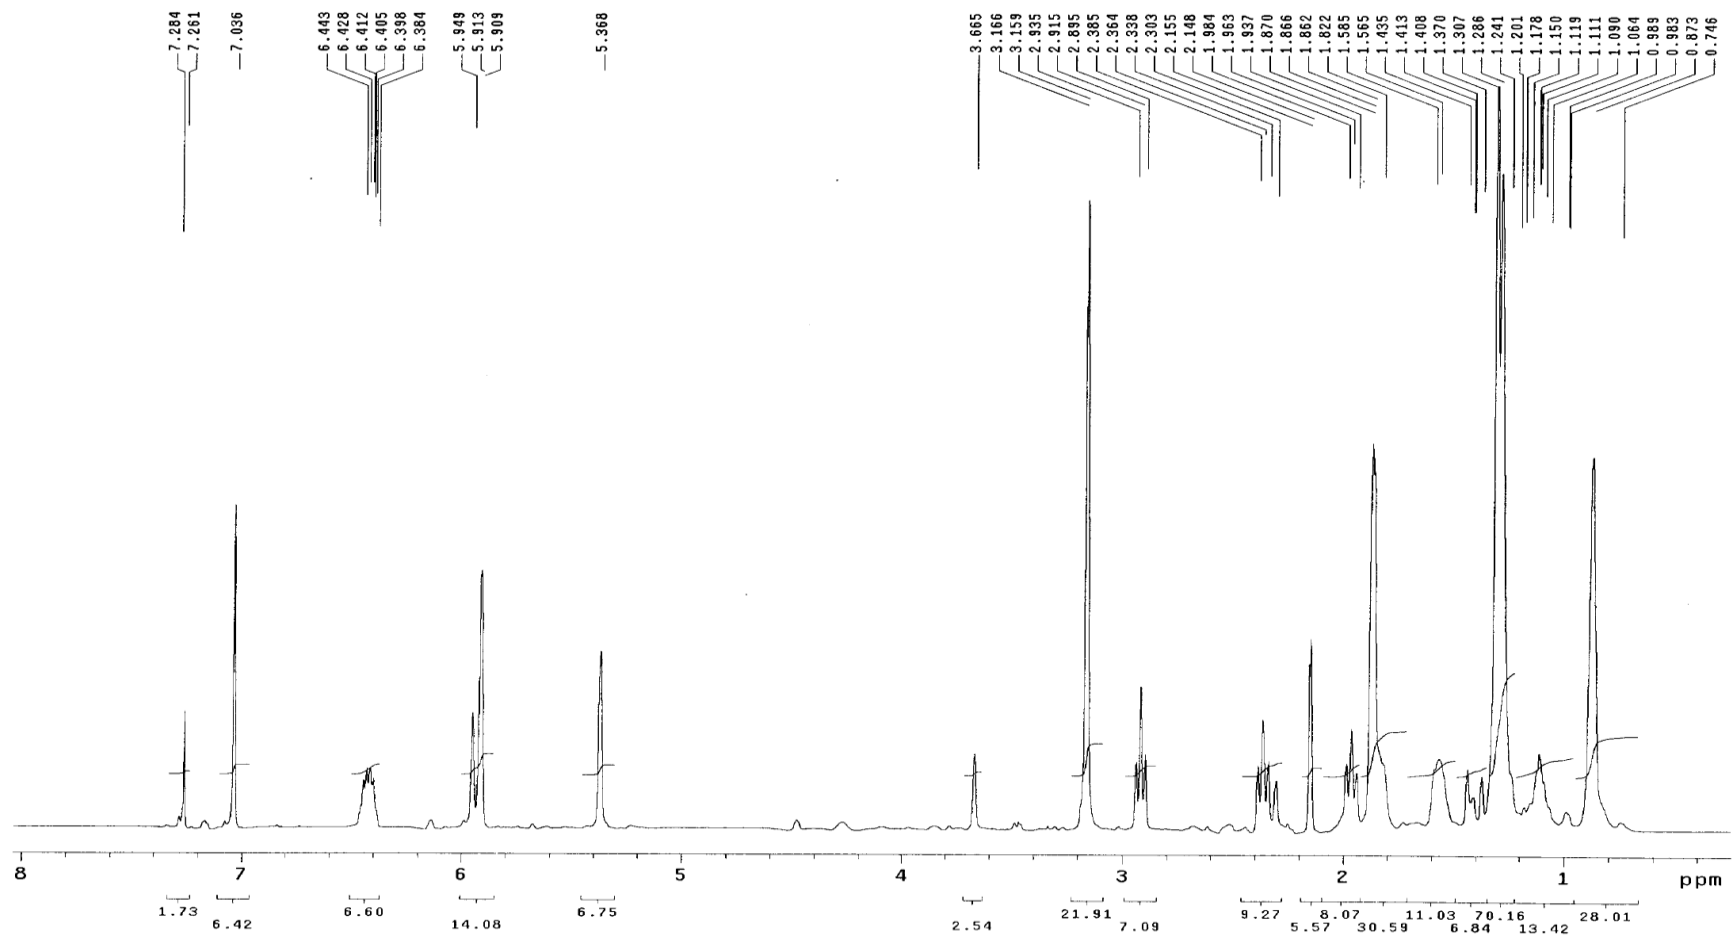

# Compound 2 C-NMR IN CD<sub>3</sub>Cl<sub>3</sub>

INOVA-500 13C-NMR HQ-13 IN CDCL3 2007.04.26

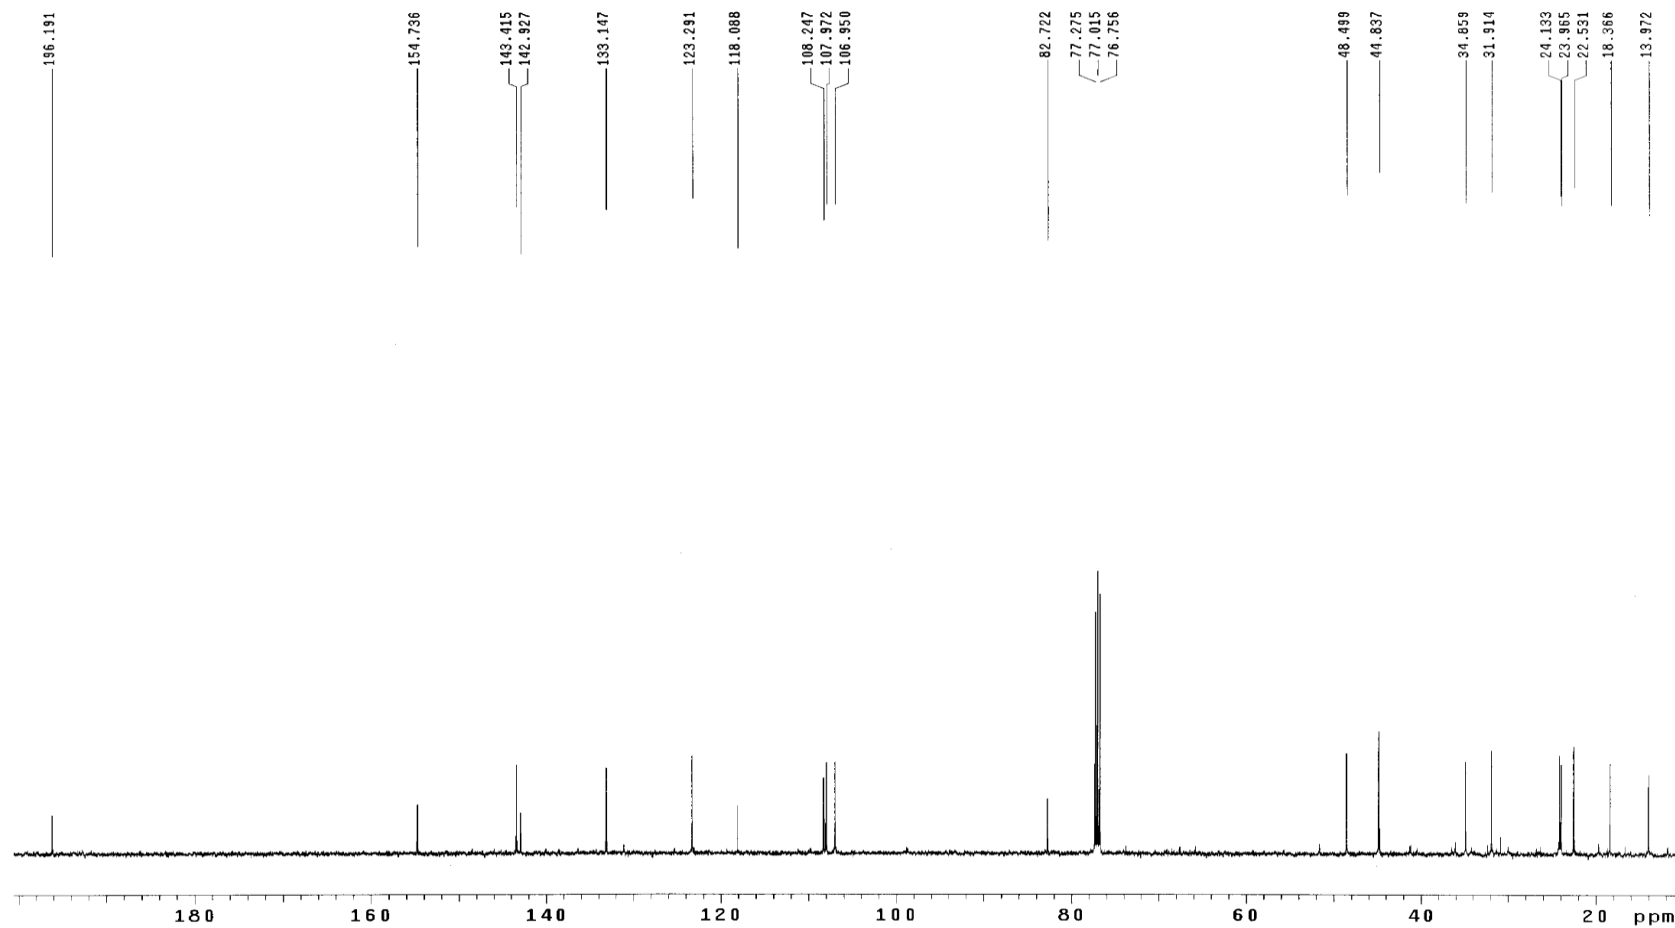

# Compound 2 gHMBC IN CD<sub>3</sub>Cl<sub>3</sub>

INOVA-501 gHMBC HQ-13 IN CDCL3 07.05.21

Solvent: CDCl<sub>3</sub>  
Temp. 25.0 C / 298.1 K  
User: 1-14-87  
INOVA-500 "IMM-501"  
Relax. delay 1.000 sec  
Acq. time 0.219 sec  
Width 4668.8 Hz  
2D Width 26411.4 Hz  
24 repetitions  
256 increments  
OBSERVE H1, 499.7702080 MHz  
DATA PROCESSING  
Sine bell 0.049 sec  
F1 DATA PROCESSING  
Sine bell 0.004 sec  
FT size 2048 x 4096  
Total time 2 hr, 14 min, 25 sec

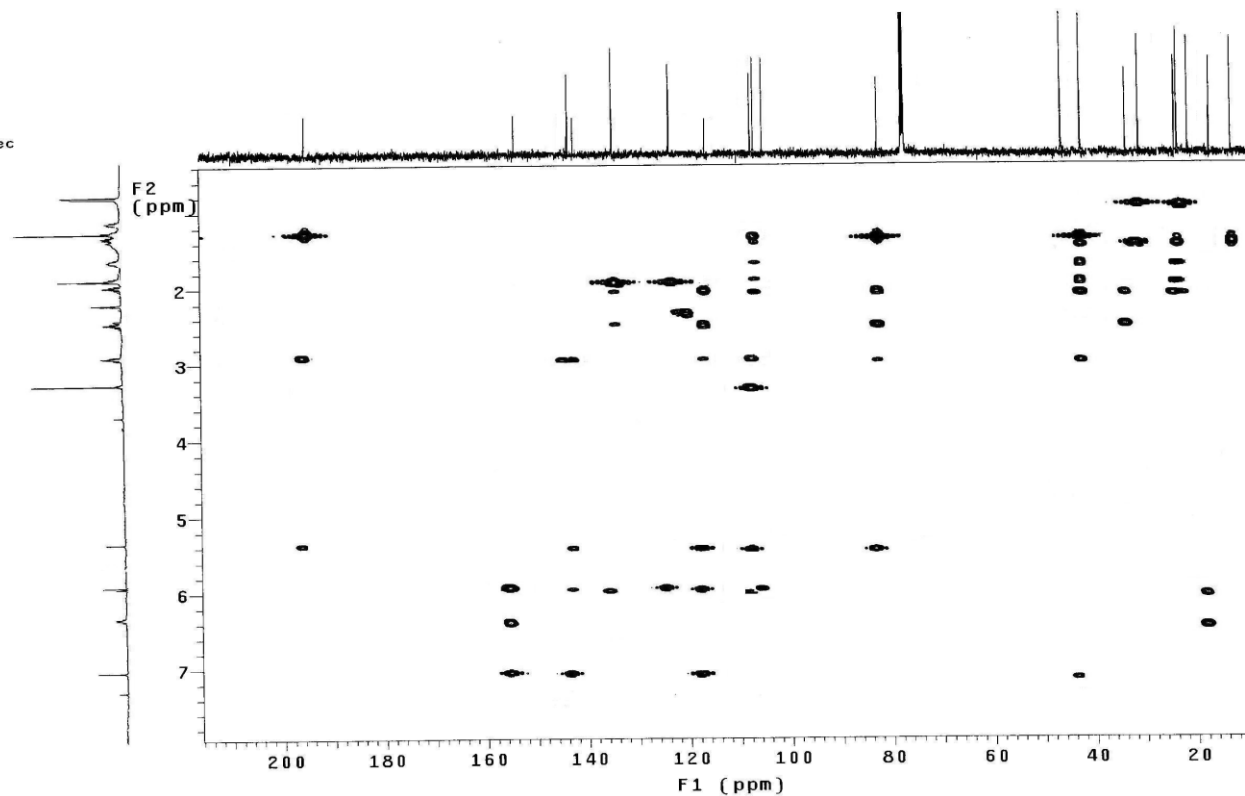

**Compound 2**   **NOESY**   **IN CD<sub>3</sub>Cl<sub>3</sub>**

WMS-601 MOESY In-13

```

Application: beamstruts
Operator: vince
VMSR500  "NOI=NOI2"

Rising: 5000 1:500 sec
Mixing: 1:000 3:300 sec
Washing: 5000 5:000 sec
Wash: 5000 5:000 sec
20 Wdth: 5000 7 Hz
16 Repetitions:
2 X 8000 Inductors
1:0000 Inductors
1:0000 Inductors
Cover: approximation 0.150 sec
DATA PROCESSING: 0.150 sec
F1 DATA PROCESSING: 0.110 sec
F2 DATA PROCESSING: 0.090 sec
Total time: 5 hr. 39 min. 3 sec

```

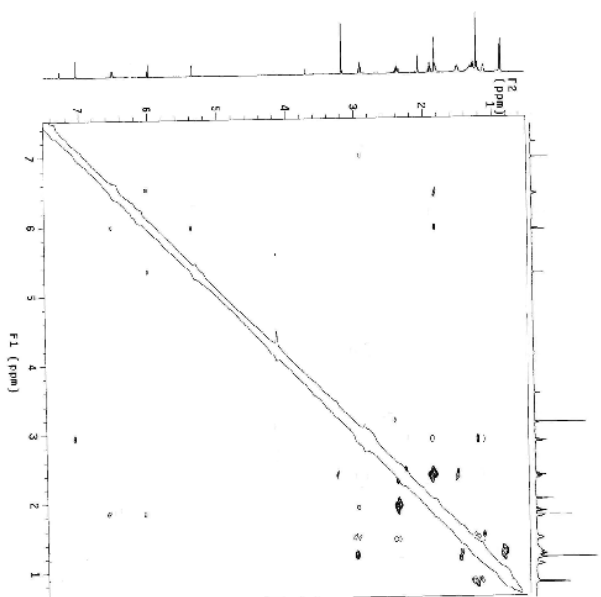

**Compound 2 CD**

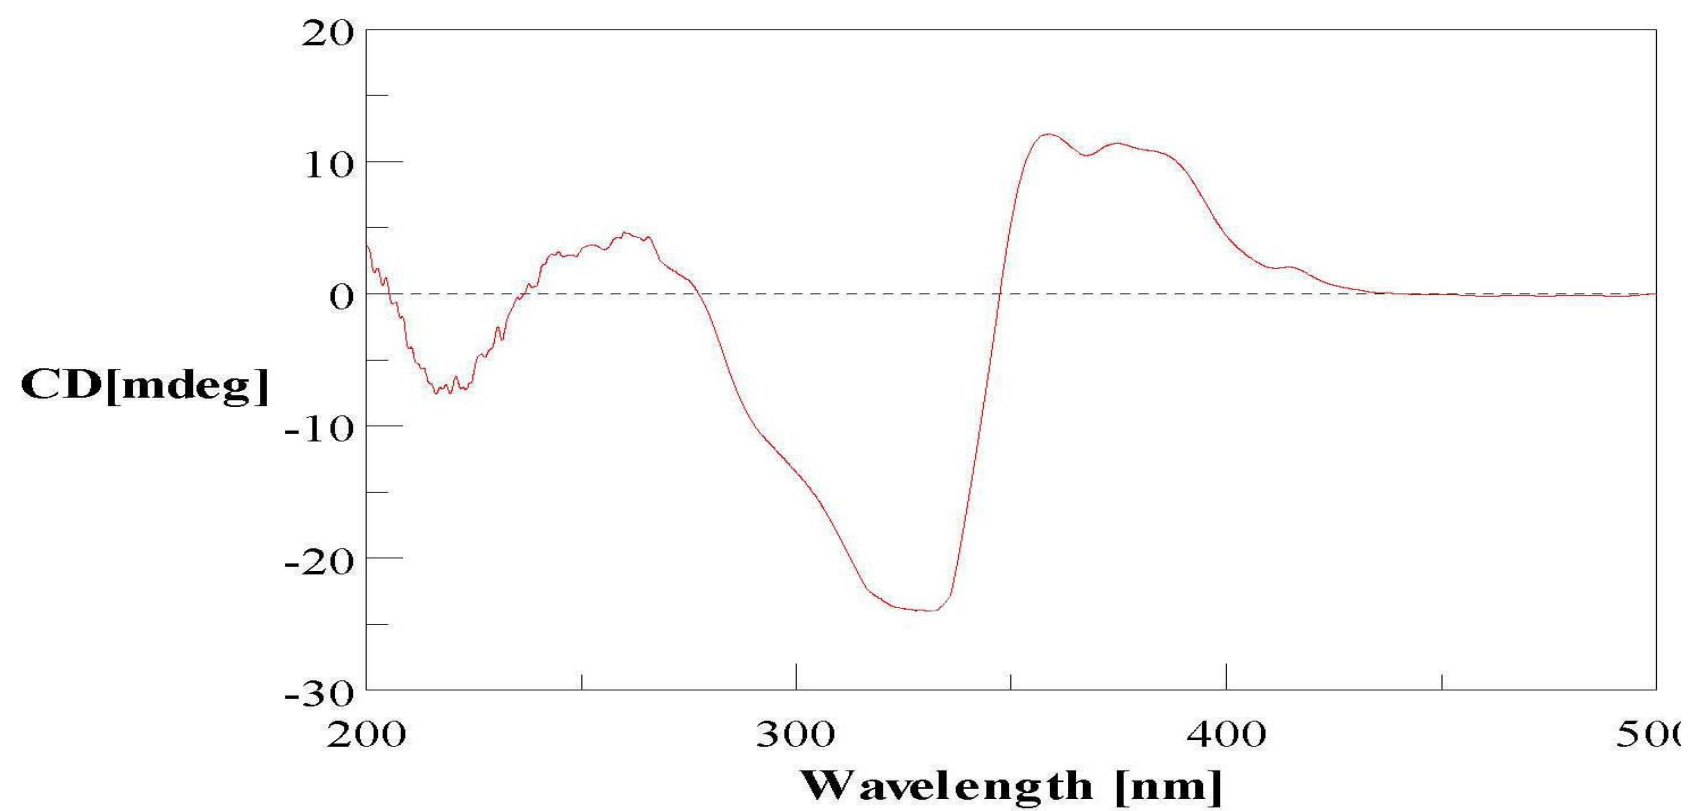



# Compound 3 <sup>1</sup>H-NMR IN CD<sub>3</sub>Cl<sub>3</sub>

INOVA-501 1H-NMR hq-1 IN CDCL<sub>3</sub> 07.04.24

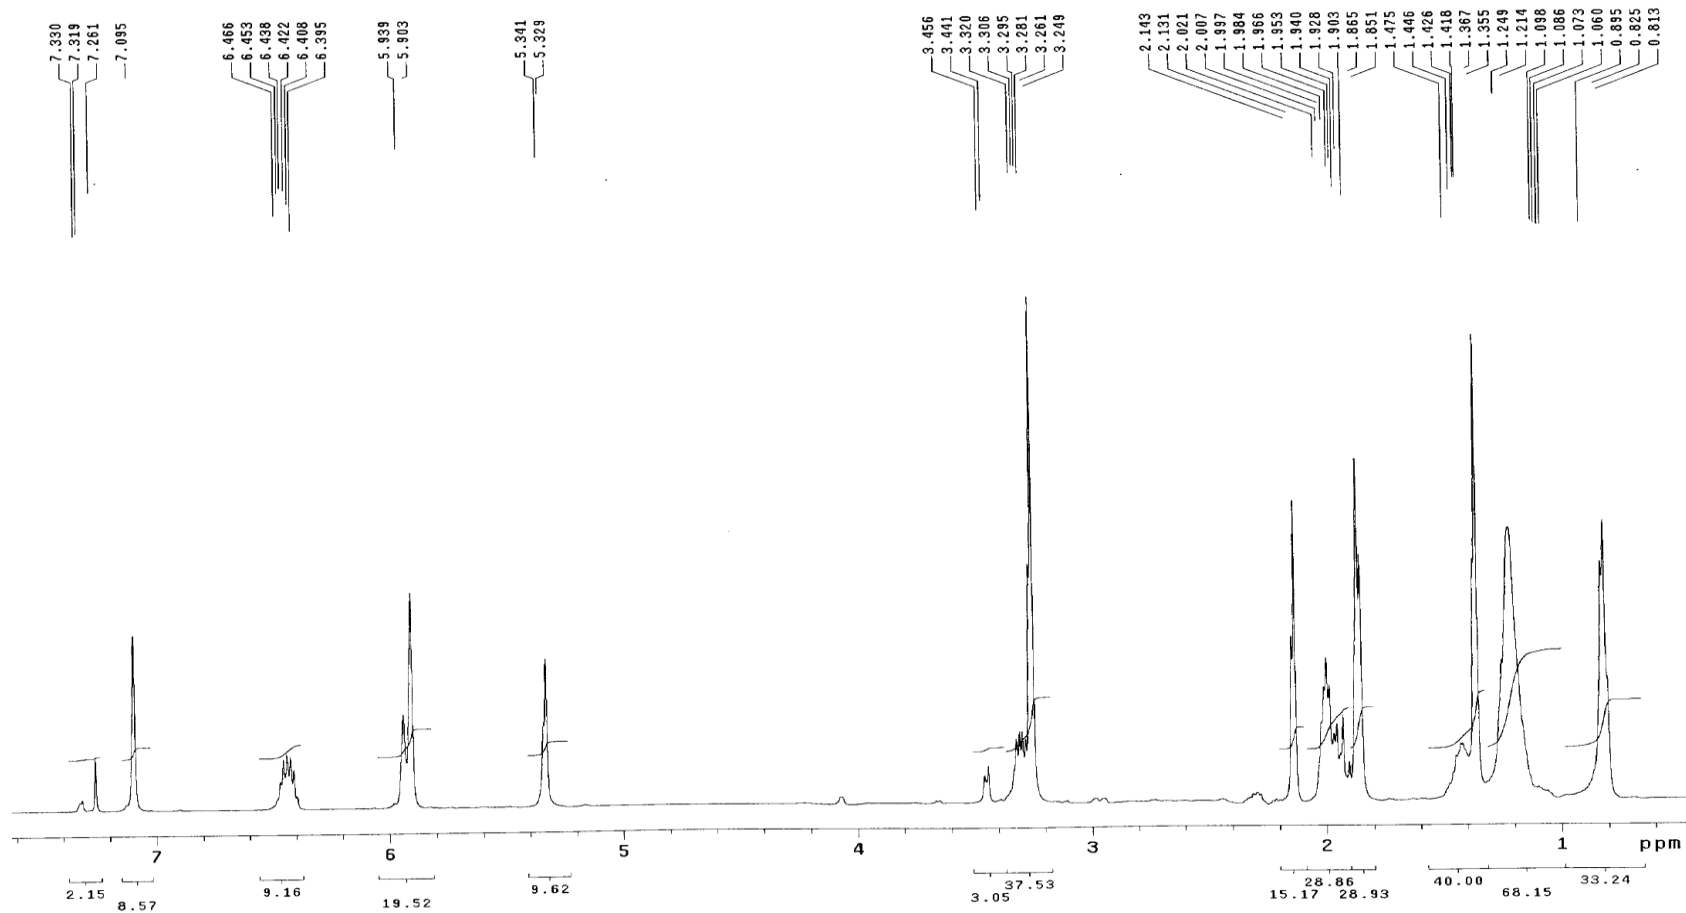

# Compound 3 C-NMR IN CD<sub>3</sub>Cl<sub>3</sub>

INOVA-500 13C-NMR HQ-14 IN CDCL3 2007.04.26

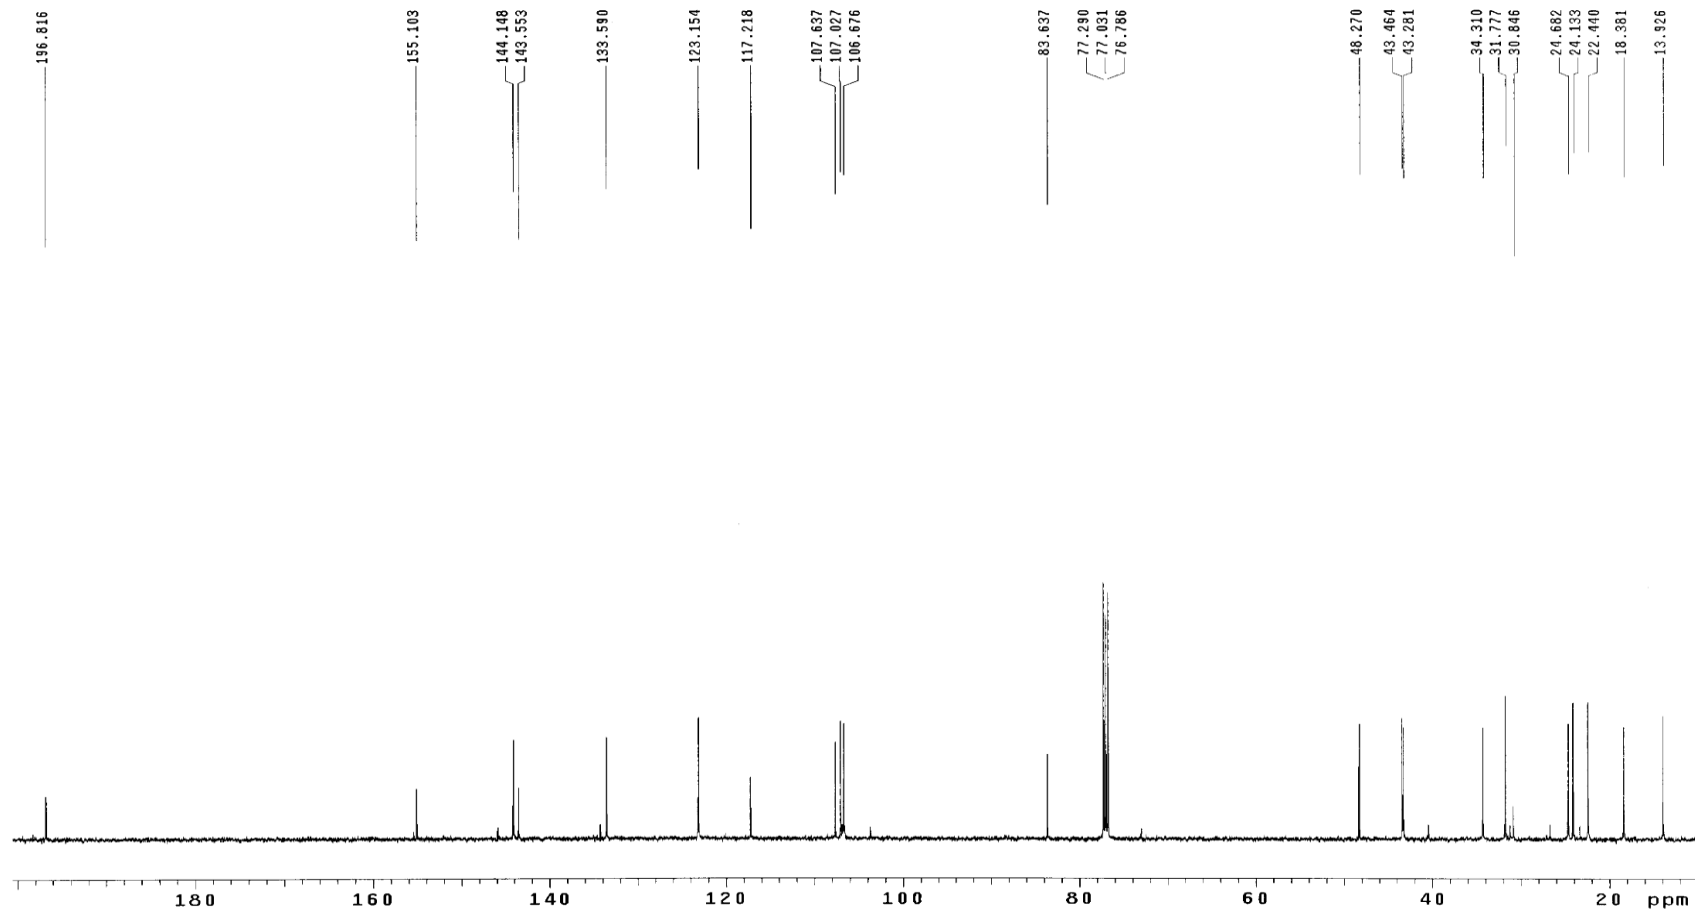

# Compound 3 gHMBC IN CD<sub>3</sub>Cl<sub>3</sub>

INOVA-501 gHMBC HQ-14 IN CDCL3 07.05.21

Solvent: CDCl<sub>3</sub>  
Temp. 25.0 C / 298.1 K  
User: 1-14-87  
INOVA-500 "IMM-501"

Relax. delay 1.000 sec  
Acq. time 0.219 sec  
Width 4668.8 Hz  
2D Width 26411.4 Hz  
24 repetitions  
256 increments  
OBSERVE H1, 499.7702080 MHz  
DATA PROCESSING  
Sine bell 0.049 sec  
F1 DATA PROCESSING  
Sine bell 0.004 sec  
FT size 2048 X 4096  
Total time 2 hr, 14 min, 25 sec

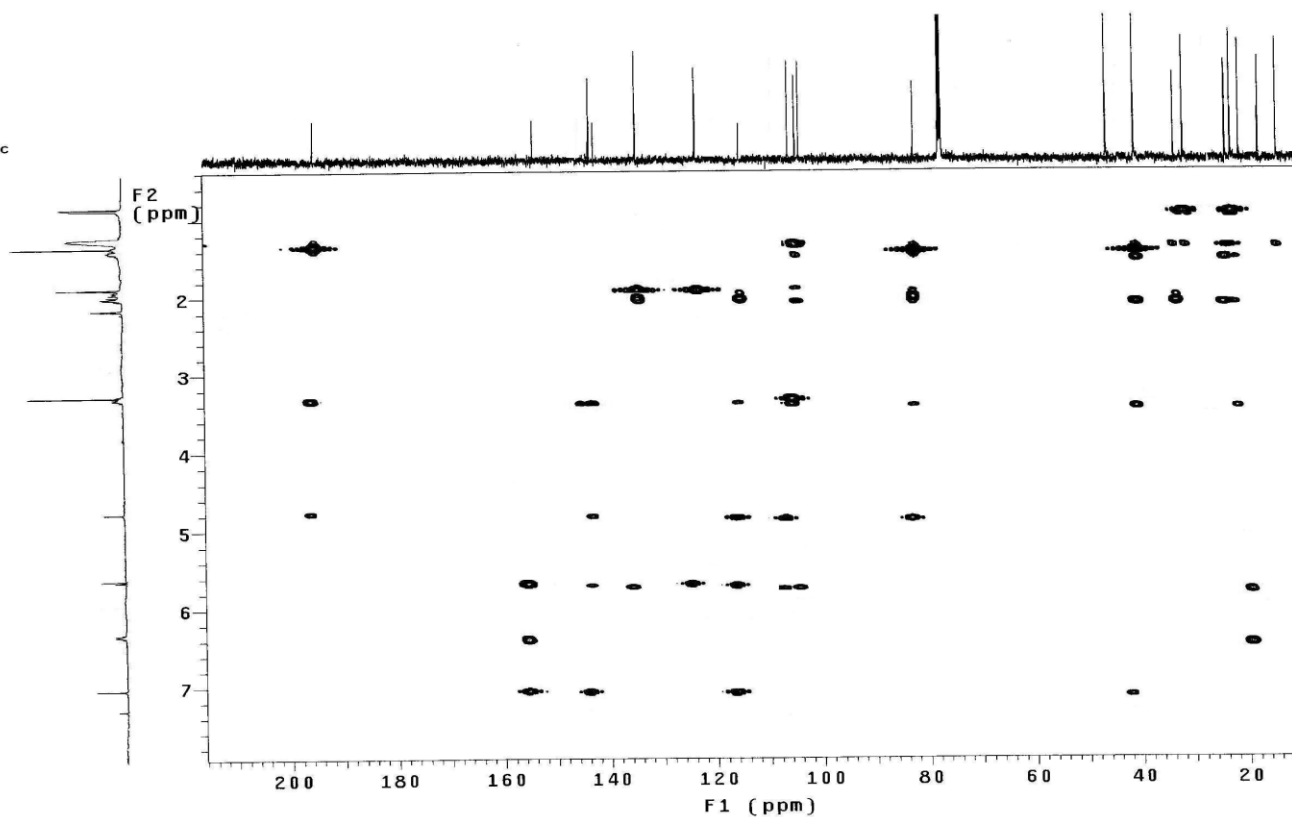

# Compound 3 NOESY IN CD<sub>3</sub>Cl<sub>3</sub>

VNS-600 NOESY hq-14

Ambient temperature  
Operator: vnmr2  
VNMRS-600 "wormhole"

Relax. delay 1.200 sec  
Mixing 0.600 sec  
Acq. time 0.197 sec  
Width 5186.7 Hz  
2D Width 5186.7 Hz  
16 repetitions  
2 x 200 increments  
OBSERVE H1, 599.6981281 MHz  
DATA PROCESSING  
Gauss apodization 0.034 sec  
F1 DATA PROCESSING  
Gauss apodization 0.010 sec  
FT size 4096 x 4096  
Total time 3 hr, 38 min, 3 sec

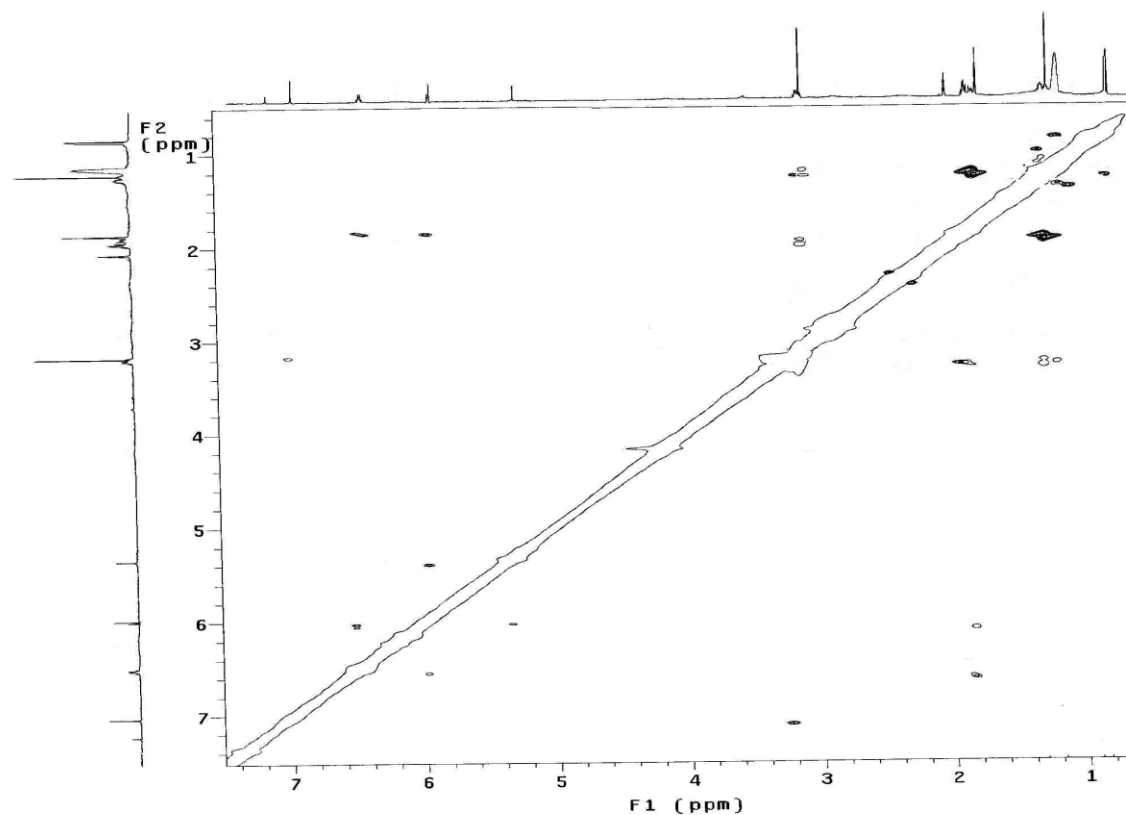

Compound 3 CD IN  $\text{CD}_3\text{Cl}_3$

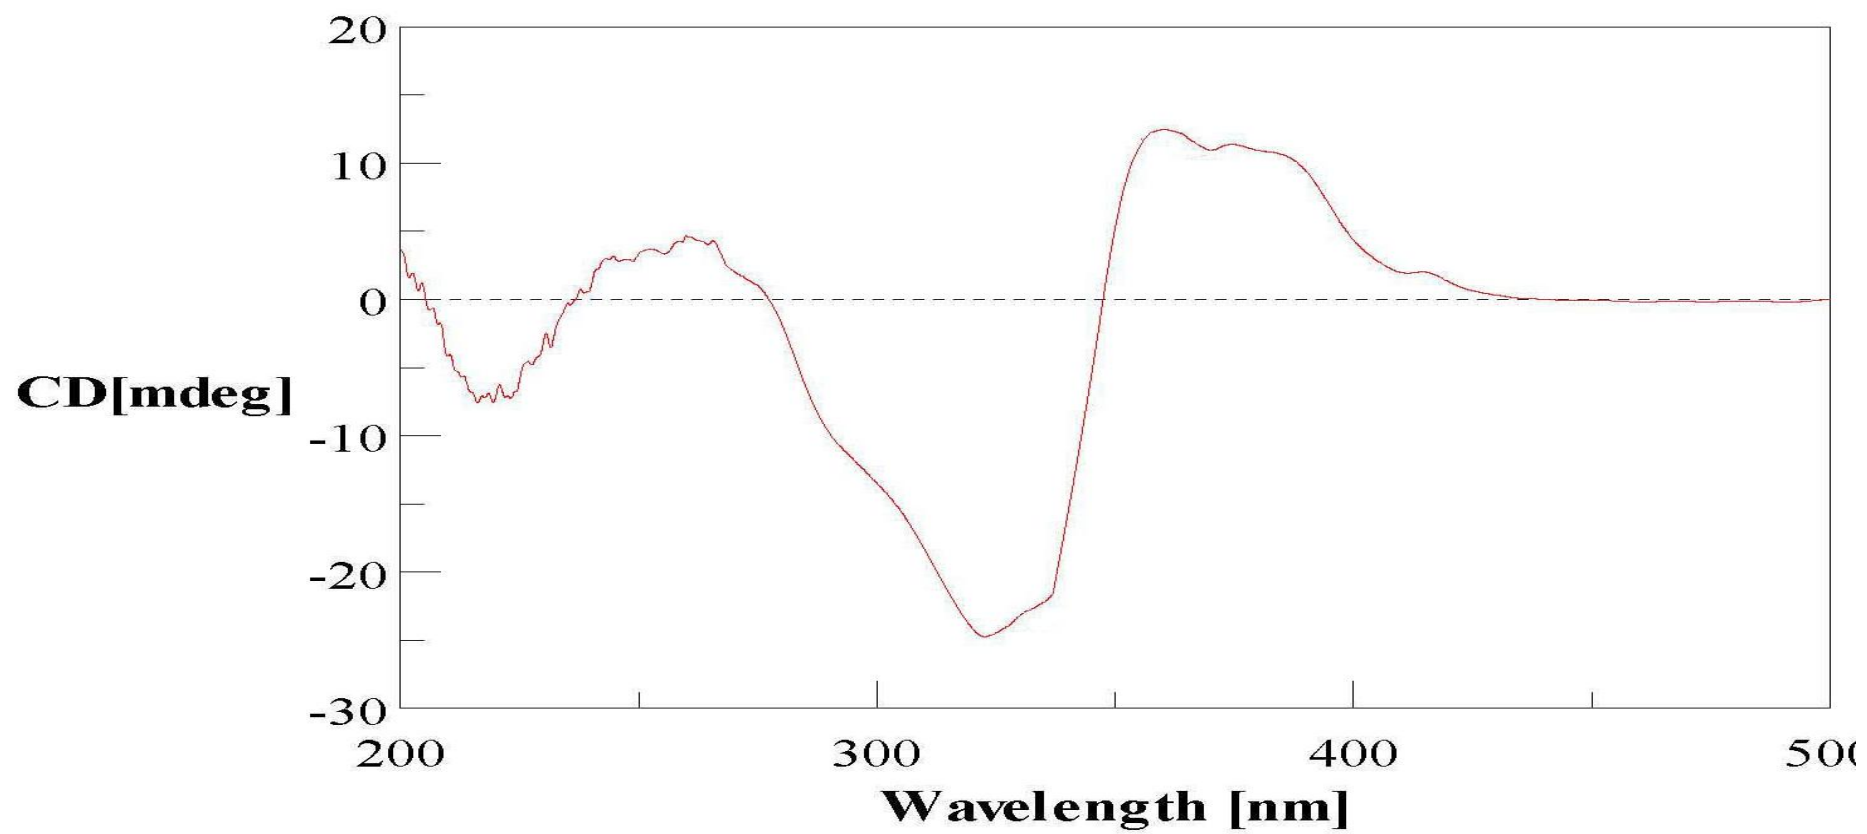

Supplement: s1 [file s1]
